# Supplementary material
Source: Springer Nature journal article supplement (https://www.springermedizin.de/resource/supplementary/12916_2011_476_MOESM3_ESM.pdf/9599784)

## Good Outcome

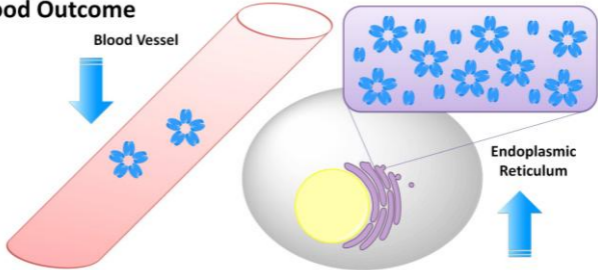

## Adverse Outcome

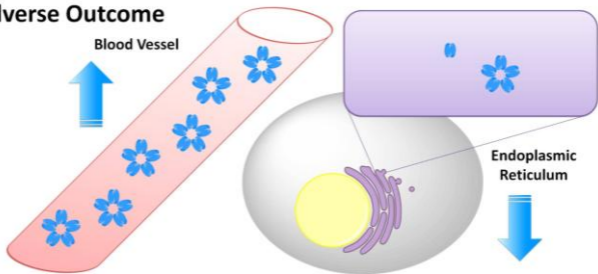

 Prx4 decamer     Prx4 dimer

Supplement: MOESM3 [file 9599784]
